# Supplementary material
Source: HighWire-hosted journal article supplement (https://jech.bmj.com/content/jech-2020-216158)

Appendix 5. Odds ratios and number of public assistance recipients with type 2 diabetes by area. Data are for 2015.

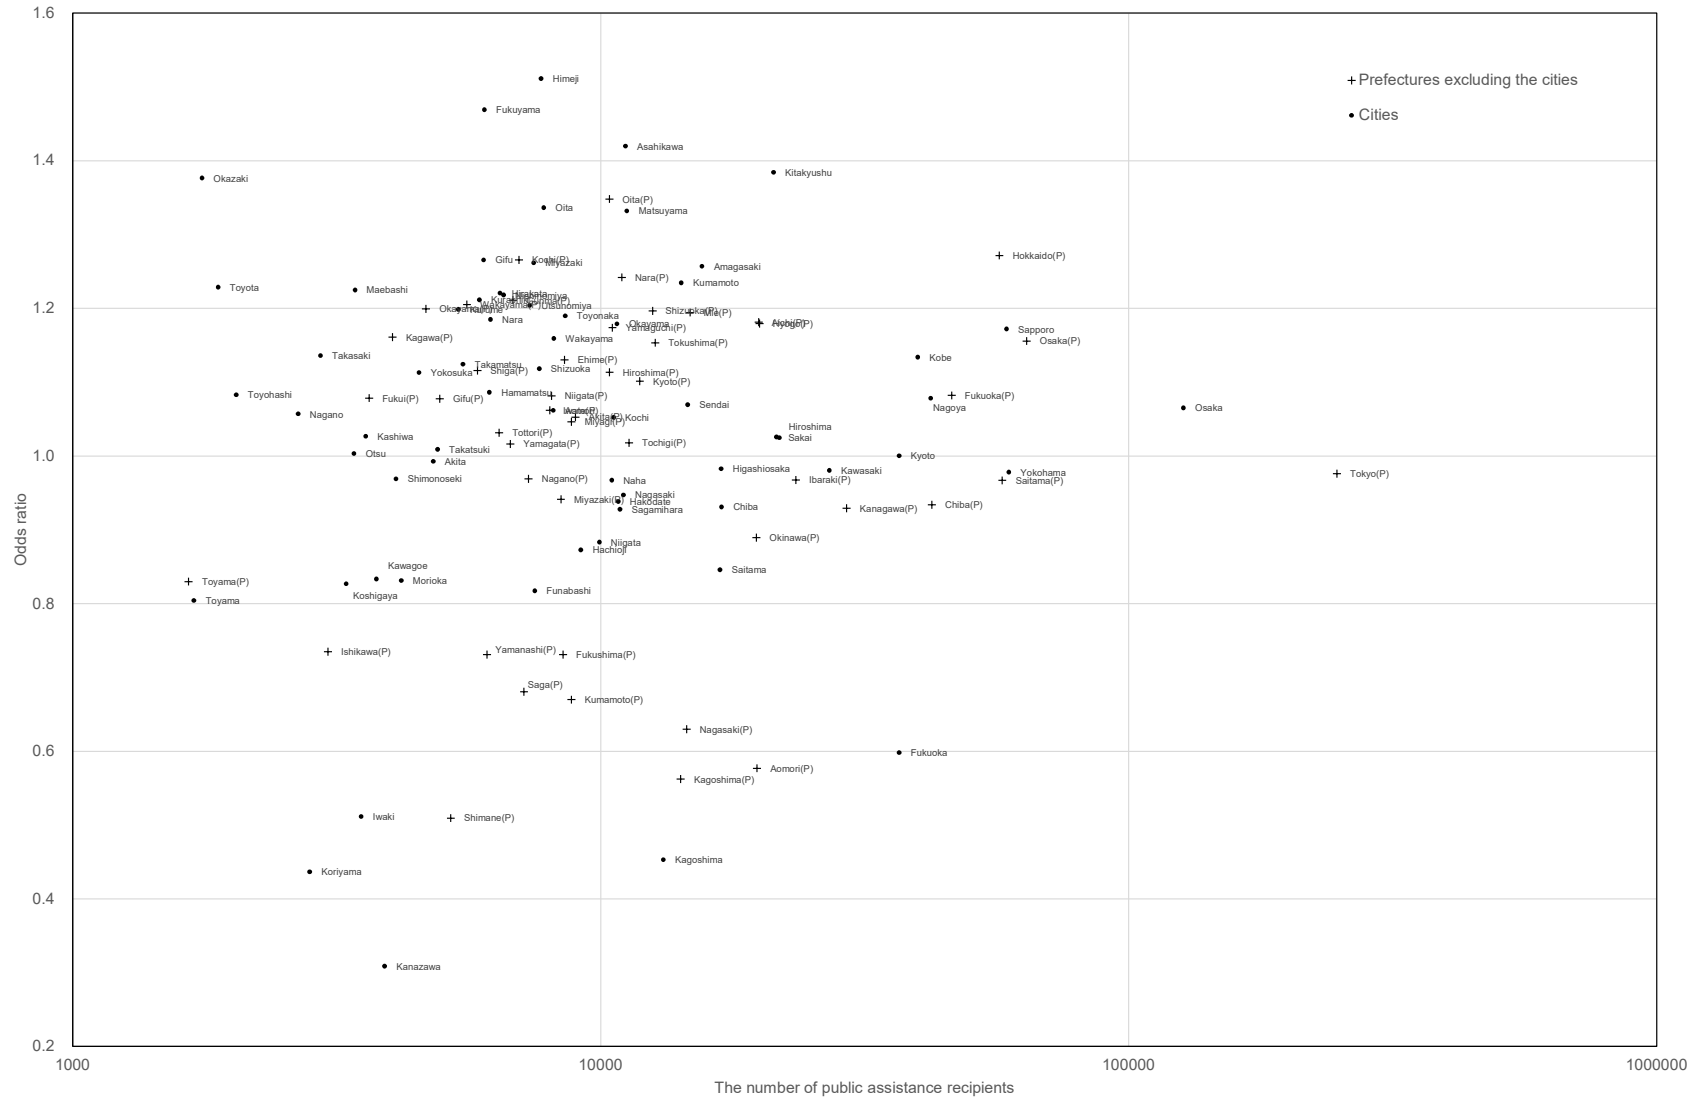

Supplement: inline-supplementary-material-5 [file inline-supplementary-material-5.pdf]
